# Supplementary material
Source: publisher figshare collection journal article supplement (https://gsapubs.figshare.com/articles/dataset/_/24237184)
Supplement: Supplementary file 1 [file 2]

## Sheet: Foram results
Pizer, C., Clark, K., Howarth, J., Howell, A., Delano, J., Hayward, B.W., Litchfield, N., 2023, A 5000-year record of coastal uplift and subsidence reveals multiple source faults for past earthquakes on the central Hikurangi margin: GSA Bulletin, https://doi.org/10.1130/B36995.1.
Supplementary Material File 3
Results of foraminifera analysis on cores from Pakuratahi Valley.
											Above MHW saltmarsh		Intertidal, low salinity		Sheltered intertidal		Subtidal, near normal salinity						Subtidal marine						Inner shelf									Inner mid-shelf
Core section	Depth (in core section)	Stratigraphic context	Weight >63 um	Size fraction counted	Amount counted	Weight counted	Total forams	Forams per 1 g	In situ forams	% Reworked	Haplophragmoides wilbertii	Trochammina inflata	Trochammina irregularis	Trochamminita salsa	Ammonia spp.	Scherochorella monoliformis	Bolivina spp.	Elphidium advenum maori	Elphidium crispum	Elphidium excavatum oirgi	Elphidium spp.	Haynesina depressula	Cibicides spp.	Discorbinella spp.	Elphidium charlottense	Notorotalia inornata	Rosalina bradyi	Zeafloralis parri	Bulamina elongata	Bulamina gibba	Bulamina sp.	Cibicides corticatus	Elphidium novozealandica	Notorotalia aucklandica	Notorotalia depressa	Notorotalia hornibrooki	Quinqueloculina incisa	Cassidulina carinata	Cassidulina laevigata	Cibicidoides dispars	Evolvocassidulina orientalis	Fissurina claricuta	Globocassidulina canalisiturata	Lagena hispida	Lenticulina spp.	Nonionellina magnolingua	Oolina spp.	Trifarina spp.	Triloculina trigonula
UV-V2-D (FV2D)	0.33-0.34	Zone 3 grey silt	0.16	63-250	0.5	0.08	120	1500	119	0.833333	0	0	0	0	88	0	0	0	0	0	28	3	0	0	0	0	0	0	0	0	0	0	0	0	1	0	0	0	0	0	0	0	0	0	0	0	0	0	0
UV-V2-D (FV2D)	0.43-0.44	Zone 3 grey silt	0.74	63-250	0.5	0.37	74	200	73	1.35135	0	0	0	0	26	0	0	39	0	7	-	0	0	0	0	0	0	1	0	0	0	0	0	0	0	0	0	0	0	0	0	1	0	0	0	0	0	0	0
UV-V2-D (FV2D)	0.70-0.71	Zone 2 organic silt	0.28	63-250	0.25	0.07	0	0	0	#DIV/0!	0	0	0	0	0	0	0	0	0	0	0	0	0	0	0	0	0	0	0	0	0	0	0	0	0	0	0	0	0	0	0	0	0	0	0	0	0	0	0
UV-V2-D (FV2D)	0.75-0.76	Zone 2 organic silt	0.07	63-250	1	0.07	189	2700	189	0	0	0	0	0	175	0	0	0	0	0	10	4	0	0	0	0	0	0	0	0	0	0	0	0	0	0	0	0	0	0	0	0	0	0	0	0	0	0	0
UV-V2-D (FV2D)	0.89-0.90	Zone 1 grey silt	0.38	63-250	1	0.38	567	1492.11	567	0	0	0	0	0	525	0	0	0	0	0	20	22	0	0	0	0	0	0	0	0	0	0	0	0	0	0	0	0	0	0	0	0	0	0	0	0	0	0	0
MV-O1 (SO1)	0.10-0.11	Zone 6 organic silt	0.29	63-250	1	0.29	0	0	0	#DIV/0!	0	0	0	0	0	0	0	0	0	0	0	0	0	0	0	0	0	0	0	0	0	0	0	0	0	0	0	0	0	0	0	0	0	0	0	0	0	0	0
MV-O1 (SO1)	0.16-0.17	Zone 6 organic silt	0.15	63-250	1	0.15	0	0	0	#DIV/0!	0	0	0	0	0	0	0	0	0	0	0	0	0	0	0	0	0	0	0	0	0	0	0	0	0	0	0	0	0	0	0	0	0	0	0	0	0	0	0
MV-O1 (SO1)	0.75-0.76	Zone 3 grey silt	0.33	63-250	1	0.33	136	412.121	136	0	0	0	0	0	128	0	0	0	0	0	8	0	0	0	0	0	0	0	0	0	0	0	0	0	0	0	0	0	0	0	0	0	0	0	0	0	0	0	0
LV-V1-A (SS1A)	0.33-0.34	Zone 7 sand	1.98	63-250	0.125	0.2475	50	202.02	24	52	0	0	0	0	1	0	7	0	0	0	11	3	0	0	0	0	0	0	0	0	0	0	0	0	3	0	0	15	0	0	4	1	0	0	0	0	1	0	0
LV-V1-A (SS1A)	0.43-0.44	Zone 7 sand	3.1	63-250	0.0635	0.19685	51	259.081	16	68.6275	0	0	0	0	0	0	0	0	0	0	12	2	0	0	0	0	0	0	0	0	0	0	0	0	6	0	3	14	0	0	2	1	0	0	0	0	1	1	0
LV-V1-A (SS1A)	0.53-0.54	Zone 6 organic silt	0.5	63-250	0.125	0.0625	3	48	3	0	0	0	0	0	0	0	0	0	0	0	0	1	0	0	0	0	0	0	0	0	0	0	0	0	0	0	0	0	0	0	0	0	0	0	0	0	2	0	0
LV-V1-A (SS1A)	0.63-0.64	Zone 6 silt	0.2	63-250	1	0.2	66	330	63	4.54545	0	0	0	0	60	0	0	0	0	0	1	2	0	0	0	0	0	0	0	0	0	0	0	0	0	0	0	2	0	0	0	0	0	0	0	0	0	0	0
LV-V1-A (SS1A)	0.73-0.74	Zone 6 sandy silt	0.29	63-250	0.5	0.145	19	131.034	12	36.8421	0	0	0	0	8	0	0	0	0	0	2	1	0	0	0	0	0	0	0	0	0	0	0	0	0	0	0	7	0	0	0	1	0	0	0	0	0	0	0
LV-V1-A (SS1A)	0.81-0.82	Zone 6 sand	2.48	63-250	0.125	0.31	98	316.129	44	55.102	0	0	0	0	1	0	2	0	0	0	38	1	5	2	0	0	0	0	0	0	0	0	0	0	12	0	0	21	0	0	4	0	0	0	0	0	2	0	3
LV-V1-A (SS1A)	0.89-0.90	Zone 6 sand	2.17	63-250	0.25	0.5425	58	106.912	28	51.7241	0	0	0	0	9	0	0	0	0	0	14	0	3	0	0	0	0	0	3	0	0	0	0	0	10	0	0	13	0	0	3	2	0	0	0	0	0	0	0
LV-V1-A (SS1A)	0.93-0.94	Zone 6 silty sand	0.86	63-250	0.375	0.3225	84	260.465	69	17.8571	0	0	0	0	53	0	1	0	0	0	11	0	0	0	0	0	0	3	1	0	0	3	0	0	9	0	0	0	0	0	0	3	0	0	0	0	0	0	0
LV-V1-A (SS1A)	0.97-0.98	Zone 6 sand	0.32	63-250	0.5	0.16	7	43.75	5	28.5714	0	0	0	0	3	0	0	0	0	0	2	0	0	0	0	0	0	0	0	0	0	0	0	0	1	0	0	0	0	0	0	0	0	0	0	0	0	0	0
LV-V1-B (SS1B)	0.14-0.15	Zone 5 peat (silt lens)	0.09	63-250	1	0.09	2	22.2222	2	0	0	0	0	0	0	0	1	0	0	0	0	0	0	0	0	0	0	0	0	0	0	0	0	0	0	0	0	0	0	0	0	0	0	0	0	0	1	0	0
LV-V1-B (SS1B)	0.59-0.60	Zone 5 organic silt	0.24	63-250	0.125	0.03	0	0	0	#DIV/0!	0	0	0	0	0	0	0	0	0	0	0	0	0	0	0	0	0	0	0	0	0	0	0	0	0	0	0	0	0	0	0	0	0	0	0	0	0	0	0
LV-V1-B (SS1B)	0.64-0.65	Zone 5 organic silt	0.34	63-250	0.125	0.0425	0	0	0	#DIV/0!	0	0	0	0	0	0	0	0	0	0	0	0	0	0	0	0	0	0	0	0	0	0	0	0	0	0	0	0	0	0	0	0	0	0	0	0	0	0	0
LV-V1-B (SS1B)	0.89-0.90	Zone 3 silt	0.8	63-250	0.0635	0.0508	343	6751.97	343	0	0	0	0	0	307	0	0	0	0	0	8	28	0	0	0	0	0	0	0	0	0	0	0	0	0	0	0	0	0	0	0	0	0	0	0	0	0	0	0
LV-V1-B (SS1B)	0.93-0.94	Zone 3 silt	0.32	63-250	0.25	0.08	380	4750	380	0	0	0	0	0	362	0	0	0	0	0	6	12	0	0	0	0	0	0	0	0	0	0	0	0	0	0	0	0	0	0	0	0	0	0	0	0	0	0	0
LV-V2-B (FSV1B)	0.25-0.26	Zone 7 sand	5.31	63-250	0.078125	0.414844	110	265.16	30	72.7273	0	0	0	0	3	0	3	6	0	1	0	14	6	0	8	14	0	0	0	0	0	0	0	0	0	0	0	0	13	0	0	2	12	0	17	0	1	0	0
LV-V2-B (FSV1B)	0.30-0.31	Zone 7 sand	2.79	63-250	0.125	0.34875	61	174.91	9	85.2459	0	0	0	0	3	9	0	0	0	0	0	1	1	0	0	23	0	0	0	4	0	0	0	0	5	0	0	0	9	0	0	1	0	0	3	0	0	0	0
LV-V2-B (FSV1B)	0.36-0.37	Zone 7 silty sand	2.08	63-250	0.125	0.26	72	276.923	25	65.2778	0	0	0	0	1	x	0	0	0	13	0	3	0	0	0	0	0	0	0	0	7	0	0	0	0	11	0	0	26	0	0	1	4	2	0	0	0	0	0
LV-V2-B (FSV1B)	0.41-0.42	Zone 7 silty sand	3.29	63-250	0.125	0.41125	63	153.191	13	79.3651	0	0	0	0	0	0	2	3	0	0	0	2	3	0	0	6	0	0	0	0	2	0	0	7	0	0	0	0	13	0	3	3	0	0	10	0	1	0	0
LV-V2-B (FSV1B)	0.46-0.47	Zone 7 sand	2.71	63-250	0.125	0.33875	52	153.506	18	65.3846	0	0	0	0	0	0	4	0	0	0	4	7	0	0	0	0	0	0	0	1	0	0	0	0	0	0	0	0	13	0	0	2	2	0	10	0	0	0	0
LV-V2-B (FSV1B)	0.46-0.47	Zone 7 silty sand	0.02	250	1	0.02	9	450	0	100	0	0	0	0	0	5	0	0	0	0	0	0	0	0	0	4	0	0	0	0	0	0	0	0	0	0	0	0	0	0	0	0	0	0	0	0	0	0	0
LV-V2-B (FSV1B)	0.51-0.52	Zone 7 sand	3.1	63-250	0.125	0.3875	53	136.774	20	62.2642	0	0	0	1	0	0	0	0	0	0	10	4	1	0	0	8	0	0	0	0	2	0	1	0	3	0	0	0	5	0	6	2	0	0	5	0	1	0	0
LV-V2-B (FSV1B)	0.59-0.60	Zone 7 sand	4.04	63-250	0.0625	0.2525	69	273.267	19	72.4638	1	0	0	0	0	0	2	4	0	2	0	2	0	0	0	7	0	0	0	0	4	0	0	0	0	0	0	0	22	0	0	3	1	0	12	0	1	0	0
LV-V2-B (FSV1B)	0.63-0.64	Zone 7 sand	5.75	63-250	0.0625	0.359375	63	175.304	3	95.2381	0	0	0	0	0	x	0	0	0	0	0	0	8	0	10	0	0	0	0	0	2	0	0	26	0	0	0	0	7	0	0	1	0	0	1	1	0	0	1
LV-V2-B (FSV1B)	0.68-0.69	Zone 6 organic silt	0.34	63-250	0.5	0.17	63	370.588	34	46.0317	0	0	0	31	0	x	1	0	0	0	0	0	0	0	0	0	0	0	0	0	2	0	0	0	0	3	0	0	7	6	0	0	2	0	0	0	0	0	1
LV-V2-B (FSV1B)	0.70-0.71	Zone 6 organic silt	WET	63-250	-	-	30	-	30	0	0	30	0	0	0	0	0	0	0	0	0	0	0	0	0	0	0	0	0	0	0	0	0	0	0	0	0	0	0	0	0	0	0	0	0	0	0	0	0
LV-V2-B (FSV1B)	0.70-0.71	Zone 6 organic silt	WET	250	-	-	21	-	10	52.381	0	0	6	4	0	6	0	0	0	0	0	0	0	0	0	5	0	0	0	0	0	0	0	0	0	0	0	0	0	0	0	0	0	0	0	0	0	0	0
LV-V2-B (FSV1B)	0.73-0.78	Zone 6 organic sandy silt	2.31	63-250	0.25	0.5775	89	154.113	30	66.2921	0	3	2	16	1	0	1	1	0	0	0	2	1	0	8	10	0	0	0	0	2	0	1	0	0	5	0	0	17	0	0	2	2	0	5	0	0	0	0
LV-V2-B (FSV1B)	0.78-0.79	Zone 6 organic sandy silt	3.02	63-250	0.25	0.755	24	31.7881	23	4.16667	5	0	2	15	0	0	0	0	0	0	0	0	0	0	0	1	0	0	0	0	0	0	0	0	0	0	0	0	0	0	0	0	0	0	0	0	1	0	0
LV-V2-B (FSV1B)	0.83-0.86	Zone 6 organic sandy silt	4.87	63-250	0.1875	0.913125	7	7.66598	7	0	1	2	1	3	0	0	0	0	0	0	0	0	0	0	0	0	0	0	0	0	0	0	0	0	0	0	0	0	0	0	0	0	0	0	0	0	0	0	0
LV-V2-B (FSV1B)	0.86-0.87	Zone 6 organic silt	WET	63-250	1	-	69	-	69	0	2	4	2	61	0	0	0	0	0	0	0	0	0	0	0	0	0	0	0	0	0	0	0	0	0	0	0	0	0	0	0	0	0	0	0	0	0	0	0
LV-V2-B (FSV1B)	0.90-0.91	Zone 6 organic silt	WET	63-250	-	-	220	-	220	0	0	210	10	0	0	0	0	0	0	0	0	0	0	0	0	0	0	0	0	0	0	0	0	0	0	0	0	0	0	0	0	0	0	0	0	0	0	0	0
LV-V2-B (FSV1B)	0.90-0.91	Zone 6 organic silt	WET	250	-	-	36	-	36	0	14	0	16	6	0	0	0	0	0	0	0	0	0	0	0	0	0	0	0	0	0	0	0	0	0	0	0	0	0	0	0	0	0	0	0	0	0	0	0
LV-V2-B (FSV1B)	0.93-0.94	Zone 6 organic silt	WET	63-250	0.15	-	202	-	202	0	5	6	12	179	0	0	0	0	0	0	0	0	0	0	0	0	0	0	0	0	0	0	0	0	0	0	0	0	0	0	0	0	0	0	0	0	0	0	0
LV-V2-B (FSV1B)	0.98-0.99	Zone 6 organic silt	0.8	63-250	0.5	0.4	50	125	36	28	0	8	5	20	1	0	1	0	0	0	0	0	0	0	0	0	0	0	0	0	0	0	0	0	0	0	0	0	8	0	0	0	0	0	5	0	1	0	0
LV-V3-C (FSV2C)	0.11-0.12	Zone 6 silt	0.59	250	1	0.59	3	5.08475	1	66.6667	0	0	0	0	0	1	0	0	0	0	1	0	0	0	0	0	0	0	0	0	0	0	0	0	1	0	0	0	0	0	0	0	0	0	0	0	0	0	0
LV-V3-C (FSV2C)	0.14-0.15	Zone 6 silt	0.98	63-250	0.5	0.49	0	0	0	#DIV/0!	0	0	0	0	0	0	0	0	0	0	0	0	0	0	0	0	0	0	0	0	0	0	0	0	0	0	0	0	0	0	0	0	0	0	0	0	0	0	0
LV-V3-C (FSV2C)	0.14-0.15	Zone 6 silt	0.18	250	1	0.18	7	38.8889	2	71.4286	0	0	0	0	2	5	0	0	0	0	0	0	0	0	0	0	0	0	0	0	0	0	0	0	0	0	0	0	0	0	0	0	0	0	0	0	0	0	0
LV-V3-C (FSV2C)	0.33-0.34	Zone 5 peat	WET	63-250	-	-	0	-	0	#DIV/0!	0	0	0	0	0	0	0	0	0	0	0	0	0	0	0	0	0	0	0	0	0	0	0	0	0	0	0	0	0	0	0	0	0	0	0	0	0	0	0
LV-V3-C (FSV2C)	0.33-0.34	Zone 5 peat	WET	250	-	-	14	-	14	0	0	0	14	0	0	0	0	0	0	0	0	0	0	0	0	0	0	0	0	0	0	0	0	0	0	0	0	0	0	0	0	0	0	0	0	0	0	0	0
LV-V3-C (FSV2C)	0.39-0.40	Zone 5 peat	WET	63-250	-	-	0	-	0	#DIV/0!	0	0	0	0	0	0	0	0	0	0	0	0	0	0	0	0	0	0	0	0	0	0	0	0	0	0	0	0	0	0	0	0	0	0	0	0	0	0	0
LV-V3-C (FSV2C)	0.39-0.40	Zone 5 peat	WET	250	-	-	0	-	0	#DIV/0!	0	0	0	0	0	0	0	0	0	0	0	0	0	0	0	0	0	0	0	0	0	0	0	0	0	0	0	0	0	0	0	0	0	0	0	0	0	0	0
LV-V3-D (FSV2D)	0.72-0.73	Zone 3 silt	6.56	63-250	0.125	0.82	85	103.659	27	68.2353	0	0	0	0	18	0	0	2	0	3	0	0	8	0	6	16	0	0	3	0	0	0	0	17	0	0	0	0	1	0	0	0	6	0	0	0	1	0	0
LV-V3-D (FSV2D)	0.89-0.90	Zone 3 sand	4.72	63-250	0.03125	0.1475	149	1010.17	137	8.05369	0	0	0	0	110	0	0	11	0	0	0	10	3	0	0	7	0	0	5	0	0	0	1	0	0	0	0	0	1	0	0	0	0	0	0	0	1	0	0
LV-V4-A (FSV3A)	0.81-0.82	Zone 7 organic silt	3.27	63-250	0.25	0.8175	71	86.8502	31	56.338	0	8	0	0	2	0	8	6	0	0	0	1	5	0	8	3	1	0	1	0	0	0	0	0	0	1	0	7	0	0	2	1	0	0	3	0	4	0	0
LV-V4-A (FSV3A)	0.81-0.82	Zone 7 organic silt	0.05	250	1	0.05	34	680	19	44.1176	0	12	0	0	2	9	0	2	1	0	0	2	0	0	0	0	0	0	0	0	0	0	2	4	0	0	0	0	0	0	0	0	0	0	0	0	0	0	0
LV-V4-A (FSV3A)	0.95-0.96	Zone 7 silt	1.05	63-250	0.25	0.2625	8	30.4762	8	0	1	0	0	0	3	0	0	0	0	3	0	0	0	0	0	0	0	0	0	0	0	0	0	0	0	0	0	0	0	0	0	1	0	0	0	0	0	0	0
LV-V4-A (FSV3A)	0.95-0.96	Zone 7 ogranic silt	0.1	250	1	0.1	11	110	8	27.2727	0	0	0	0	8	0	0	0	0	0	0	0	0	0	0	0	0	0	0	0	0	0	1	1	0	0	0	0	0	0	0	0	0	0	0	0	0	0	0
LV-V4-B (FSV3B)	0.11-0.12	Zone 7 silt	1.98	63-250	0.21875	0.433125	55	126.984	36	34.5455	0	1	0	0	4	0	3	8	0	12	0	6	0	0	5	0	0	0	0	0	0	0	0	0	0	0	0	5	0	0	0	1	0	0	4	0	1	0	0
LV-V4-B (FSV3B)	0.22-0.23	Zone 7 silt	2.27	63-250	0.25	0.5675	51	89.8678	35	31.3725	0	0	0	0	0	0	0	6	0	20	0	2	1	0	1	0	0	0	0	0	5	0	1	0	0	5	0	1	0	0	0	0	0	0	0	0	2	0	0
LV-V4-B (FSV3B)	0.22-0.23	Zone 7 silt	0.17	250	1	0.17	12	70.5882	7	41.6667	0	0	0	0	6	1	0	0	0	0	1	0	0	0	0	1	0	0	0	0	0	0	0	1	0	0	0	0	0	0	0	0	0	0	2	0	0	0	0
LV-V4-B (FSV3B)	0.47-0.48	Zone 7 sandy silt	2.47	63-250	0.1875	0.463125	69	148.988	46	33.3333	10	0	0	0	1	0	3	0	2	19	0	7	2	0	0	0	0	0	0	0	0	0	1	0	0	0	0	6	0	0	0	3	0	0	5	0	1	0	0
LV-V4-B (FSV3B)	0.47-0.48	Zone 7 sandy silt	0.2	250	1	0.2	24	120	16	33.3333	8	0	0	0	6	2	0	0	0	0	0	2	0	0	0	2	0	0	0	0	0	0	0	2	0	0	0	0	0	0	0	0	0	0	2	0	0	0	0
LV-V4-B (FSV3B)	0.55-0.56	Zone 7 sandy silt	3.16	63-250	0.25	0.79	46	58.2278	18	60.8696	0	0	0	0	3	0	0	0	0	2	0	6	3	0	3	11	0	0	0	0	2	0	1	0	0	0	0	0	3	0	0	4	0	0	6	0	1	0	0
LV-V4-B (FSV3B)	0.62-0.63	Zone 7 RDL	7.36	63-250	0.125	0.92	49	53.2609	14	71.4286	0	0	0	0	6	0	1	4	0	0	1	2	4	0	2	6	0	0	0	0	0	0	0	0	1	5	0	1	3	0	2	0	0	0	8	0	0	0	0
LV-V4-B (FSV3B)	0.81-0.82	Zone 7 RDL	6.14	63-250	0.0625	0.38375	51	132.899	13	74.5098	0	0	0	0	0	0	4	4	0	1	0	1	0	0	12	7	0	0	0	0	2	0	0	0	4	0	0	0	0	0	2	0	5	0	5	0	1	0	0
LV-V4-B (FSV3B)	0.85-0.86	Zone 7 RDL	4.81	63-250	0.25	1.2025	54	44.9064	11	79.6296	0	0	0	0	7	0	0	0	2	0	0	2	3	0	2	27	1	1	0	0	0	0	2	0	0	0	0	0	2	0	0	0	0	0	1	0	0	0	0
LV-V4-B (FSV3B)	0.88-0.89	Zone 7 RDL	6.16	63-250	0.1875	1.155	66	57.1429	13	80.303	0	0	0	0	3	0	0	0	1	0	0	5	0	0	14	11	0	0	3	0	0	0	0	6	0	10	0	0	5	0	0	0	3	0	0	0	1	0	0
LV-V4-B (FSV3B)	0.945-0.955	Zone 6 organic silt	WET	63-250	0.15	-	110	-	110	0	0	1	9	100	0	0	0	0	0	0	0	0	0	0	0	0	0	0	0	0	0	0	0	0	0	0	0	0	0	0	0	0	0	0	0	0	0	0	0
LV-V4-B (FSV3B)	0.97-0.98	Zone 6 organic silt	0.18	63-250	1	0.18	5	27.7778	5	0	0	0	0	5	0	0	0	0	0	0	0	0	0	0	0	0	0	0	0	0	0	0	0	0	0	0	0	0	0	0	0	0	0	0	0	0	0	0	0
LV-V4-B (FSV3B)	0.99-1.00	Zone 6 organic silt	WET	63-250	0.15	-	103	-	103	0	0	5	18	80	0	0	0	0	0	0	0	0	0	0	0	0	0	0	0	0	0	0	0	0	0	0	0	0	0	0	0	0	0	0	0	0	0	0	0
LV-V4-C (FSV3C)	0.04-0.05	Zone 6 silt	0.35	63-250	0.5	0.175	1	5.71429	1	0	0	0	1	0	0	0	0	0	0	0	0	0	0	0	0	0	0	0	0	0	0	0	0	0	0	0	0	0	0	0	0	0	0	0	0	0	0	0	0
LV-V4-C (FSV3C)	0.20-0.21	Zone 6 silt	0.45	63-250	0.5	0.225	0	0	0	#DIV/0!	0	0	0	0	0	0	0	0	0	0	0	0	0	0	0	0	0	0	0	0	0	0	0	0	0	0	0	0	0	0	0	0	0	0	0	0	0	0	0
LV-V4-C (FSV3C)	0.34-0.35	Zone 6 silt	0.62	63-250	0.25	0.155	0	0	0	#DIV/0!	0	0	0	0	0	0	0	0	0	0	0	0	0	0	0	0	0	0	0	0	0	0	0	0	0	0	0	0	0	0	0	0	0	0	0	0	0	0	0
PK-V2-B (PK2B)	0.05-0.06	Zone 7 sand	3.67	63-250	0.375	1.37625	88	63.9419	44	50	0	0	0	0	18	0	0	0	0	0	22	2	0	0	0	0	0	3	0	0	0	0	0	0	25	0	1	0	0	5	6	1	0	0	1	0	1	0	0
PK-V2-B (PK2B)	0.20-0.21	Zone 6 silt	0.36	63-250	1	0.36	2	5.55556	0	100	0	0	0	0	0	0	0	0	0	0	0	0	0	0	1	0	0	0	0	0	0	0	0	0	1	0	0	0	0	0	0	0	0	0	0	0	0	0	0
Notes: Core ID as in paper is followed by original ID. Depths are relative to 0 m at the top of each core section (as in stratigraphic logs; Supplementary Data File 2). Some samples have additional counted of >250 um fraction (grey). Samples with total <10 are red. Species were identified and grouped by environmental preference according to Hayward (2014). In situ species defined by previous work…
[truncated: 7 more columns]

## Sheet: Diatom results
Pizer, C., Clark, K., Howarth, J., Howell, A., Delano, J., Hayward, B.W., Litchfield, N., 2023, A 5000-year record of coastal uplift and subsidence reveals multiple source faults for past earthquakes on the central Hikurangi margin: GSA Bulletin, https://doi.org/10.1130/B36995.1.
Supplemental Material File 3
Results of diatom analysis on cores from Pakuratahi Valley.
	Core section:	UV-V2-D	UV-V2-D	UV-V2-D	UV-V2-D	UV-V2-D	UV-V2-D	UV-V2-D	UV-V2-D	UV-V2-D		UV-V2-B	UV-V2-B		MV-01	MV-01	MV-01	MV-01	MV-01	MV-01	MV-01	MV-01		LV-V1-B	LV-V1-B	LV-V1-B	LV-V1-B
	Core depth:	0.10-0.11	0.33-0.34	0.43-0.44	0.48-0.49	0.58-0.59	0.63-0.64	0.70-0.71	0.75-0.76	0.89-0.90		0.66-0.67	0.88-0.89		0.10-0.11	0.15-0.16	0.25-0.26	0.40-0.41	0.45-0.46	0.53-0.54	0.73-0.74	0.75-0.76		0.64-0.65	0.64-0.65	0.89-0.90	0.93-0.94
	Sample number:	D9	D8	D7	D6	D5	D4	D3	D2	D1		D11	D10		D8	D7	D6	D5	D4	D3	D2	D1		D5	D5 ex. Fragilaria sp.	D3	D2
	Stratigraphic context:	Zone 3 silt	Zone 3 silt	Zone 3 sandy silt	Zone 2 peat	Zone 2 peat	Zone 2 peat	Zone 2 org. silt	Zone 1 silt	Zone 1 silt		Zone 5 peat	Zone 4 silt		Zone 6 org. silt	Zone 6 org. silt	Zone 5 peat	Zone 5 peat	Zone 5 peat	Zone 5 peat	Zone 3/4 silt	Zone 3 silt		Zone 5 org. silt	-	Zone 3/4 silt	Zone 3 silt
Envionment:	Species: Total diatoms:	228	267	272	0	0	220	348	273	304		317	266		363	307	331	297	308	32	331	306		391	120	422	389
Brackish marine (Hustedt, 1985)	Campylodiscus echeneis (Ehrenberg) Ehrenberg (>30 um fragments)	0	0	0	0	0	0	0	0	0		0	0		0	0	0	0	0	0	2	4		0	0	3	0
	Delphineis surirella (Ehrenberg) G.W.Andrews 1981	0	5	3	0	0	0	0	2	4		0	0		0	0	0	0	0	0	0	0		0	0	0	0
	Dimeragramma minor var nana Gregory (Hartley)	0	0	0	0	0	0	0	0	2		0	1		0	0	0	0	0	0	0	0		0	0	0	0
	Diploneis smithii (Brebisson ex W. Smith) Cleve (Hartley)	0	0	0	0	0	4	7	19	12		0	0		0	0	0	0	0	0	0	0		0	0	0	0
	Fallacia tenera (Hustedt) D.G Mann	6	5	2	0	0	0	0	3	3		0	0		0	0	0	0	0	0	0	0		0	0	0	0
	Navicula cancellata Donkin 1872	0	0	4	0	0	0	2	0	0		0	0		0	5	0	2	0	0	0	0		0	0	0	0
	Nitzschia compressa (Bailey) C.S.Boyer 1916 / Tryblionella compressa (Bailey) Poulin 1990	20	25	16	0	0	0	0	5	3		0	20		0	0	0	0	0	0	2	0		0	0	0	4
	Nitzschia granulata Grunow 1880 / Tryblionella granulata (Grunow) D.G.Mann, 1990	53	49	77	0	0	0	2	48	49		0	15		0	0	0	0	0	0	3	3		0	0	0	0
	Nitzschia granulata (longer)	0	0	0	0	0	0	0	3	11		0	0		0	0	0	0	0	0	0	0		0	0	0	0
	Nitzschia panduriformis Gregory (Hartley)	2	6	3	0	0	0	0	6	4		0	0		0	0	0	0	0	0	0	0		0	0	0	0
	Paralia sulcata	32	27	20	0	0	36	2	55	85		0	15		0	0	0	0	0	0	3	3		0	0	1	23
	Paralia sulcata (intaglio valve)	0	2	0	0	0	0	0	16	30		0	0		0	0	0	0	0	0	0	0		0	0	0	0
	Petroneis marina (Ralfs) D.G.Mann 1990	0	4	1	0	0	0	0	1	2		0	0		0	0	0	0	0	0	0	0		0	0	0	0
	Psammodiscus nitidus (W.Gregory) Round & D.G.Mann 1980	0	0	2	0	0	0	0	1	0		0	0		0	0	0	0	0	0	0	0		0	0	0	0
	Thalassiosira eccentrica (Hartley)	0	0	2	0	0	0	0	15	3		0	1		0	0	0	0	0	0	0	0		0	0	0	0
	Thalassiosira leptopa (Hartley)	5	3	0	0	0	0	0	2	3		0	0		0	0	0	0	0	0	0	0		0	0	0	0
Brackish - indifferent (Hustedt, 1985)	Amphora bicapitata M.H.Hohn & J.Hellerman 1966	3	3	3	0	0	0	1	0	0		0	0		0	0	0	0	0	0	0	0		0	0	0	0
	Caloneis permagna (Bailey) Cleve 1894	0	0	0	0	0	3	2	0	0		0	0		2	0	0	0	0	0	0	0		0	0	0	0
	Gyrosigma acuminatum (Kutz.) Rabenhorst	0	0	0	0	0	0	5	0	7		0	0		0	0	0	0	0	0	0	0		0	0	0	0
	Navicula peregrina (Ehrenberg) Kützing 1844	0	0	0	0	0	0	5	0	1		0	0		5	0	0	0	0	0	0	0		0	8	0	0
	Planotidium delicatulum / Achnanthes delicatula (Cleve and Grunow 1880)	0	5	22	0	0	0	6	0	0		0	0		0	5	7	5	0	0	0	0		0	0	0	0
	Achnanthes exigua (Grunow var. exigua) (K-LB)	0	0	0	0	0	0	4	0	0		2	0		1	10	6	3	0	1	0	0		2	2	2	1
	Diploneis elliptica (Kützing) Cleve 1894	7	7	14	0	0	60	0	0	0		1	2		0	0	0	0	9	6	0	0		0	0	0	0
	Fragilaria construens (Ehrenberg) Grunow 1862 / Staurosira construens Ehrenberg 1843	0	0	0	0	0	0	12	1	1		15	0		0	4	6	0	0	0	0	3		0	0	0	0
	Pinnularia maoir (Kutz.) (K-LB p.836)	0	0	0	0	0	9	0	0	0		0	0		0	0	2	0	16	0	0	0		0	0	0	0
Fresh - indifferent (Foged)	Amphora libyca (Ehrenb.) 1841	0	0	1	0	0	0	5	2	0		2	0		0	2	0	0	0	0	1	1		5	14	0	0
	Cocconeis placentula (Ehrenberg) var. placentula	0	0	0	0	0	1	8	0	0		21	0		6	0	1	2	1	0	0	0		0	1	0	0
	Cymatopleura solea (Brébisson) W.Smith 1851	0	0	0	0	0	6	0	0	0		0	0		1	5	0	0	0	0	0	0		1	5	2	0
	Fragilaria construens f. venter (Ehrenberg) Hustedt 1957 / Staurosira venter (Ehrenberg) Cleve & J.D.Möller	0	0	0	0	0	0	2	0	5		16	0		126	23	121	0	1	0	0	0		80	-	87	10
	Fragilaria pinnata (Ehrenb.) (K-LB) / Staurosirella pinnata (Ehrenb.)	0	0	1	0	0	1	92	0	0		36	2		28	155	37	108	0	0	13	8		76	-	40	5
	Pseudostaurosira brevistriata (Grunow) D.M.Williams & Round 1988 / Fragilaria brevistriata Grunow 1885	1	0	0	0	0	11	112	0	0		160	0		159	57	82	130	14	0	25	13		208	-	200	29
	Rhopalodia novae-zelandiae (Foged 1979)	0	0	1	0	0	0	3	0	0		0	0		2	1	0	0	0	0	0	0		6	30	0	0
Fresh (VD, 1994)	Achnanthes joursacensis Héribaud 1903 / Planothidium joursacense (Héribaud) Lange-Bertalot 1999 / Achnanthes joursacense	0	0	0	0	0	0	6	0	0		5	0		0	9	0	0	0	0	1	0		3	10	15	16
	Achnanthes lanceolata (Brebisson) Grunow in Cleve & Grunow spp. Lanceolata	2	1	0	0	0	0	5	0	0		0	0		0	0	0	4	1	1	1	0		0	0	0	0
	Achnanthes lanceolata var. rostrata Hustedt 1911 / Planothidium rostratoholarcticum Lange-Bert. and Bak 2014	0	0	0	0	0	0	0	0	0		0	0		2	0	0	0	0	0	9	0		0	0	0	0
	Anomeoneis sphaerophora (Ehrenberg) Pfitzer	0	0	0	0	0	1	3	0	0		0	0		0	0	0	0	0	0	0	0		0	0	0	0
	Aulacoseira valida (Grunow) Krammer	0	0	0	0	0	0	0	0	1		0	0		1	0	16	0	18	0	0	0		0	0	0	0
	Cymbella affinis (Kütz.) 1844	0	0	0	0	0	0	0	0	1		0	0		0	0	8	3	4	0	0	0		0	1	0	0
	Cymbella amphicephala (Näegeli ex Kützing 1849)/ Cymbopleura amphicephala (Naegeli) Krammer 2003	0	0	0	0	0	0	3	0	0		0	0		0	0	0	0	1	0	0	0		0	0	0	0
	Cymbella aspera (Ehrenb.) Cleve	0	0	0	0	0	0	1	0	0		0	0		0	0	0	0	144	0	0	0		0	0	0	0
	Epithemia adnata (Kützing) Brébisson 1838	0	0	0	0	0	7	9	0	0		11	0		14	4	19	0	45	1	1	0		1	17	0	0
	Epithemia sorex (Kutz.)	0	0	0	0	0	0	0	0	0		6	0		2	0	0	0	0	0	0	0		0	0	0	0
	Gomphonema minutum f. lemanense Lange-Bertalot & Reichardt	0	0	0	0	0	0	0	0	0		2	0		0	0	1	0	0	0	0	0		0	0	0	0
	Gomphonema truncatum (Ehren. 1832)	0	0	0	0	0	0	0	0	0		1	0		0	0	0	0	2	0	0	0		0	0	0	0
	Navicula antonii Lange-Bert. 2000	0	0	0	0	0	0	10	0	0		0	0		1	0	10	0	0	0	0	0		2	5	0	0
	Navicula gastrum (Ehrenberg) Kützing 1844	0	0	0	0	0	0	0	0	0		0	0		1	0	0	0	3	0	0	0		0	0	0	0
	Nitzschia palea (Kützing) W.Smith 1856	0	1	2	0	0	0	1	3	0		0	0		0	0	0	3	0	2	0	0		0	0	0	0
	Nitzschia perminuta Grunow 1881	0	0	0	0	0	0	0	0	0		0	0		4	1	2	0	0	0	0	0		0	0	0	0
	Stauroneis phoenicenteron (Nitzsch) Ehrenb.	0	0	0	0	0	0	0	0	0		0	0		1	1	2	0	11	0	0	0		0	0	0	0
	Ulnaria capitata (Ehrenberg) Compère 2001	0	0	0	0	0	0	0	0	0		0	0		3	3	6	6	22	0	0	0		0	0	0	0
	Ulnaria ulna (Nitzsch) Compère 2001	0	0	0	0	0	10	9	3	0		37	1		1	0	11	18	11	0	0	0		0	0	0	0
Salt intolerant (VD, 1994)	Aulacoseira crenulata (Ehrenb.) Krammer	0	0	0	0	0	0	0	0	0		1	0		0	0	0	13	0	0	0	0		0	0	0	0
Fragments:	Gyrosigma sp. fragments >30 um	1	8	0	0	0	0	0	10	0		0	3		3	1	0	1	0	0	1	1		0	0	0	0
	Pinnularia sp. fragments	0	0	0	0	0	0	2	9	1		0	0		3	0	0	0	0	0	1	0		0	5	0	0
	Surirella sp. fragments	0	0	0	0	0	55	7	0	0		0	0		0	0	0	0	0	0	0	0		0	0	0	0
Unidentified species:	Small Paralia-like sp. with micropores, no strae	8	36	0	0	0	0	0	0	0		0	29		0	0	1	1	0	0	25	119		0	0	14	255
	Small Paralia-like sp. with strae	28	27	35	0	0	0	0	48	29		0	80		0	0	0	0	0	0	9	14		0	0	6	8
	Pseudopodosira sp. 5 (texture, no dimple, or structure within, outer structure sometimes present)	0	0	0	0	0	0	0	8	0		0	0		0	0	0	0	0	0	51	23		0	0	0	9
	Pseudopodosira sp. 2 (micropores like paralia, outer structure and dimple Cochran, 2002 sp.1)	0	0	0	0	0	0	0	1	8		0	8		0	0	0	4	2	16	11	25		0	0	29	23
	Pseudopodosira sp. 3 (textured, rings, dimple - Cochran, 2002 sp. 1, less outer structure)	0	0	0	0	0	0	0	0	0		0	15		0	0	0	0	0	0	152	93		0	0	0	0
	Pseudopodosira sp. 4 (slight texture, no rings, dimple)	0	4	0	0	0	0	0	0	0		0	0		0	0	0	0	0	0	29	4		0	0	0	5
	Pseudopodosira sp. 6 (two hemispheres)	55	42	40	0	0	0	0	0	0		0	48		0	0	0	0	0	0	0	0		0	0	0	0
Notes: Diatom species were identified from a range of sources (Hartley et al., 1996; Hendey, 1974; Hustedt and Jensen, 1985; Krammer, 1988, 1991a, b; Krammer, 1991c) and grouped by environmental preference based on Cochran (2002); Van Dam et al. (1994); Vos and de Wolf (1993). Nomenclature consequently varies and notes are provided for the specific reference. K-LB = Krammer & de Lange-Bertalot. S…
